# Supplementary material for: Occurrence of Mental Illness and Mental Health Risks among the Self-Employed: A Systematic Review
Source: MDPI journal article supplement (doi:10.3390/ijerph18168617), 2021-08-15
Supplement: s1 [file ijerph-1280962-supplementary.pdf › ijerph-1280962-supplementary.pdf]

## Supplementary Materials

Table S1. Quality assessment checklist for prevalence studies (adapted from Hoy et al) [1].

| Name of author(s):   |                                                                                                                                                            |                                                                                                                                                                                                                                                 |         |
|----------------------|------------------------------------------------------------------------------------------------------------------------------------------------------------|-------------------------------------------------------------------------------------------------------------------------------------------------------------------------------------------------------------------------------------------------|---------|
| Year of publication: |                                                                                                                                                            |                                                                                                                                                                                                                                                 |         |
| Study title:         |                                                                                                                                                            |                                                                                                                                                                                                                                                 |         |
| Risk of bias items   |                                                                                                                                                            | Risk of bias levels                                                                                                                                                                                                                             |         |
|                      |                                                                                                                                                            | Points scored                                                                                                                                                                                                                                   |         |
| 1.                   | Was the study's target population a close representation of the national population in relation to relevant variables, e.g. age, sex, occupation?          | <b>Yes (LOW RISK):</b> The study's target population was a representation of the national population.                                                                                                                                           | 0 0     |
|                      |                                                                                                                                                            | <b>No (HIGH RISK):</b> The study's target population was clearly NOT representative of the national population.                                                                                                                                 | 1 1     |
| 2.                   | Was the sampling frame a true or close representation of the target population?                                                                            | <b>Yes (LOW RISK):</b> The sampling frame was a true or close representation of the target population.                                                                                                                                          | 0 0     |
|                      |                                                                                                                                                            | <b>No (HIGH RISK):</b> The sampling frame was NOT a true or close representation of the target population.                                                                                                                                      | 1 1     |
| 3.                   | Was some form of random selection used to select the sample, OR, was a census undertaken?                                                                  | <b>Yes (LOW RISK):</b> A census was undertaken, OR, some form of random selection was used to select the sample (e.g. simple random sampling, stratified random sampling, cluster sampling, systematic sampling).                               | 0 0     |
|                      |                                                                                                                                                            | <b>No (HIGH RISK):</b> A census was NOT undertaken, AND some form of random selection was NOT used to select the sample.                                                                                                                        | 1 1     |
| 4.                   | Was the likelihood of non-response bias minimal?                                                                                                           | <b>Yes (LOW RISK):</b> The response rate for the study was $\geq 75\%$ , OR, an analysis was performed that showed no significant difference in relevant demographic characteristics between responders and non- responders.                    | 0 0     |
|                      |                                                                                                                                                            | <b>No (HIGH RISK):</b> The response rate was $< 75\%$ , and if any analysis comparing responders and non-responders was done, it showed a significant difference in relevant demographic characteristics between responders and non-responders. | 1 1     |
| 5.                   | Were data collected directly from the subjects (as opposed to a proxy)?                                                                                    | <b>Yes (LOW RISK):</b> All data were collected directly from the subjects.                                                                                                                                                                      | 0 0     |
|                      |                                                                                                                                                            | <b>No (HIGH RISK):</b> In some instances, data were collected from a proxy.                                                                                                                                                                     | 1 1     |
| 6.                   | Was an acceptable case definition used in the study?                                                                                                       | <b>Yes (LOW RISK):</b> An acceptable case definition was used.                                                                                                                                                                                  | 0 0     |
|                      |                                                                                                                                                            | <b>No (HIGH RISK):</b> An acceptable case definition was NOT used.                                                                                                                                                                              | 1 1     |
| 7.                   | Was the study instrument that measured the parameter of interest (e.g. prevalence of low back pain) shown to have reliability and validity (if necessary)? | <b>Yes (LOW RISK):</b> The study instrument had been shown to have reliability and validity (if this was necessary), e.g. test-re- test, piloting, validation in a previous study, etc.                                                         | 0 0     |
|                      |                                                                                                                                                            | <b>No (HIGH RISK):</b> The study instrument had NOT been shown to have reliability or validity (if this was necessary).                                                                                                                         | 1 1     |
| 8.                   | Was the same mode of data collection used for all subjects?                                                                                                | <b>Yes (LOW RISK):</b> The same mode of data collection was used for all subjects.                                                                                                                                                              | 0 0     |
|                      |                                                                                                                                                            | <b>No (HIGH RISK):</b> The same mode of data collection was NOT used for all subjects.                                                                                                                                                          | 1 1     |
| 9.                   | Were the numerator(s) and denominator(s) for the parameter of interest appropriate?                                                                        | <b>Yes (LOW RISK):</b> The paper presented appropriate numerator(s) AND denominator(s) for the parameter of interest (e.g. the prevalence of low back pain).                                                                                    | 0 --    |
|                      |                                                                                                                                                            | <b>No (HIGH RISK):</b> The paper did present numerator(s) AND denominator(s) for the parameter of interest but one or more of these were inappropriate.                                                                                         | 1 --    |
| 10.                  | Summary on the overall risk of study bias                                                                                                                  | <b>LOW RISK</b>                                                                                                                                                                                                                                 | 0-3 0-2 |
|                      |                                                                                                                                                            | <b>MODERATE RISK</b>                                                                                                                                                                                                                            | 4-6 3-5 |
|                      |                                                                                                                                                            | <b>HIGH RISK</b>                                                                                                                                                                                                                                | 7-9 6-8 |

Table S2. Basic characteristics of **longitudinal and cross-sectional studies with moderate quality** on mental disorders comparing self-employed (s-empl) vs. employees (empl).

| Author,<br>publication date<br>[reference]                                                     | Country/<br>region of<br>study | Sample<br>size,<br>Female                              | Age<br>[Mean (SD)<br>or range]               | Source population                                                                                                  | Occupational groups                                                                                | Disease outcomes:<br>assessment tools                                                                                                                           |
|------------------------------------------------------------------------------------------------|--------------------------------|--------------------------------------------------------|----------------------------------------------|--------------------------------------------------------------------------------------------------------------------|----------------------------------------------------------------------------------------------------|-----------------------------------------------------------------------------------------------------------------------------------------------------------------|
| <b>Longitudinal study</b>                                                                      |                                |                                                        |                                              |                                                                                                                    |                                                                                                    |                                                                                                                                                                 |
| <b>EUROPE</b>                                                                                  |                                |                                                        |                                              |                                                                                                                    |                                                                                                    |                                                                                                                                                                 |
| <b>Andersson</b><br>2008,<br>(Recruitment: 1991,<br>Follow-up: 10 y,<br>Response: n.r.)<br>[2] | Sweden,                        | 1,998,<br>n.r.                                         | s-empl: 41y<br>empl: 37y                     | Swedish Level-of-Living Survey:<br>representative random sample<br>(1/1,000 of adult population)                   | s-empl vs<br>empl                                                                                  | <b>Mental health problems:</b><br>(defined as sleeping problems,<br>been tired,<br>depressed, or anxious)<br>questionnaire specially<br>developed for the study |
| <b>Cross-sectional studies</b>                                                                 |                                |                                                        |                                              |                                                                                                                    |                                                                                                    |                                                                                                                                                                 |
| <b>EUROPE</b>                                                                                  |                                |                                                        |                                              |                                                                                                                    |                                                                                                    |                                                                                                                                                                 |
| <b>Atherton</b><br>2007<br>[3]                                                                 | Great Britain                  | 8,952,<br>n.r.                                         | 45 y                                         | Perinatal mortality register                                                                                       | s-empl (without personnel) vs<br>s-empl (with personnel) vs<br>empl<br>(managerials/professionals) | <b>Anxiety and depression:</b><br>nurse-administered Clinical<br>Interview Schedule                                                                             |
| <b>Grégoris</b><br>2017<br>[4]                                                                 | France                         | 437,<br>48% (s-<br>empl)<br>42% (empl)                 | 47(8.6) y (s-empl)<br>31.7(11.4) y<br>(empl) | health-care insurance fund: self-employed and<br>several occupational health services:<br>employees<br>convenience | s-empl (food service) vs<br>empl (food service)                                                    | <b>1. Sleep disorders:</b><br>questionnaire specially<br>developed for the study<br><b>2. Stress:</b><br>"do you feel stressed?" VAS 0-<br>10                   |
| <b>Hounscome</b><br>2012<br>[5]                                                                | Great Britain                  | 784,<br>29.6 / 38.6%<br>(farmers /<br>non-<br>farmers) | >16 y                                        | Attendees of the Royal Welsh Agricultural<br>Show and the Anglesey County Show in 2002<br>convenience              | s-empl (non-farmers) vs<br>s-empl (farmers) vs<br>empl (non-farmers) vs<br>empl (farmers)          | <b>Psychological health:</b><br>12-Item General Health<br>Questionnaire (GHQ-12)                                                                                |
| <b>Rugulies</b><br>2009<br>[6]                                                                 | Denmark                        | 591,<br>58%                                            | 43(11) y                                     | Danish Civil Registration System<br>random                                                                         | s-empl (low-grade) vs<br>s-empl (high-grade) vs<br>empl (non-manual high-grade)                    | <b>Depression, Anxiety,<br/>Somatization:</b><br>Hopkins Symptom Checklist<br>92 item version (SCL-92)                                                          |
| <b>ASIA</b>                                                                                    |                                |                                                        |                                              |                                                                                                                    |                                                                                                    |                                                                                                                                                                 |
| <b>Fujino</b><br>2005<br>[7]                                                                   | Japan                          | 25,945,<br>40.5%                                       | 40-59 y                                      | all living residents<br>random                                                                                     | s-empl vs<br>empl                                                                                  | <b>Occupational perceived stress:</b><br>4-point scale                                                                                                          |

|                                        |                             |                                                                     |                                                |                                                                                                           |                                                                                |                                                                                                              |
|----------------------------------------|-----------------------------|---------------------------------------------------------------------|------------------------------------------------|-----------------------------------------------------------------------------------------------------------|--------------------------------------------------------------------------------|--------------------------------------------------------------------------------------------------------------|
| <b>Jamal<br/>2007<br/>[8]</b>          | Canada (C),<br>Pakistan (P) | 554,<br>22% (C)<br>12% (P)                                          | 40 y (C)<br>38 y (P)                           | Participants of management programs in a<br>local university, other potential participants<br>convenience | s-empl vs<br>empl (public, private<br>organizations and part-time<br>students) | <b>Burnout:</b><br>22-item Maslach Burnout<br>Inventory                                                      |
| <b>Kawakami<br/>1996<br/>[9]</b>       | Japan                       | 140,<br>n.r.                                                        | >18 y                                          | All persons living in Town A in Kofu-City<br>random                                                       | s-empl vs<br>empl (white-collar) vs<br>empl (blue-collar)                      | <b>Any / depressive disorder:</b><br>Time-Ordered Stress and<br>Health Interview (Diagnoses<br>by DSM-III-R) |
| <b>Lewin-Epstein<br/>1991<br/>[10]</b> | Israel                      | 276,<br>0%                                                          | 25-65 y                                        | Whole population of Holon (135.000 residents)<br>and Bat-Yam (130.000 residents)<br>random                | s-empl vs<br>empl                                                              | <b>Work-related stress:</b><br>questionnaire specially<br>developed for the study                            |
| <b>Lin<br/>2003<br/>[11]</b>           | Taiwan                      | 1,011,<br>5.8% (s-<br>empl)<br>3.2% (empl)                          | 46.7(8.0) y (s-<br>empl)<br>48.0(6.1) y (empl) | Routine biannual health check-up for renewal<br>of commercial driver's license<br>convenience             | s-empl (drivers) vs<br>empl (drivers)                                          | <b>Non-psychotic neurotic<br/>symptoms:</b><br>Chinese Health Questionnaire<br>(CHQ)                         |
| <b>Min<br/>2019<br/>[12]</b>           | Korea                       | 64,802,<br>35.2%                                                    | 20-59 y                                        | 2008 Korean Community Health Survey<br>(Korea centres for Disease Control and<br>Prevention)<br>register  | s-empl (0-4 employees) vs<br>s-empl (>5 employees) vs<br>empl                  | <b>Suicidal ideation / Suicide<br/>attempts:</b><br>"yes/no"-question                                        |
| <b>NORTH AMERICA</b>                   |                             |                                                                     |                                                |                                                                                                           |                                                                                |                                                                                                              |
| <b>Parasuraman<br/>2001<br/>[13]</b>   | Pennsylvania                | 99 (s-empl)<br>287 (empl),<br>46.5% (s-<br>empl)<br>51.2%<br>(empl) | n.r.                                           | adult students of evening Master of Business<br>Administration courses<br>convenience                     | s-empl vs<br>empl (organizational)                                             | <b>Life stress:</b><br>10-item scale (Parasuraman et<br>al. 1992)                                            |
| <b>Prottas<br/>2006<br/>[14]</b>       | New York                    | 3,504,<br>56%                                                       | 42.5(12.9) y                                   | 2002 National Study of the Changing<br>Workforce (NSCW)<br>random                                         | s-empl (owners) vs<br>s-empl (independants) vs<br>empl                         | <b>Stress:</b><br>questionnaire specially<br>developed for the study                                         |

SD = standard deviation, y = years, vs = versus, n.r. = not reported

Table S3. Results of cross-sectional studies on psychiatric disorders comparing self-employed (s-empl) vs employees (empl) of moderate or poor quality studies.

| Author,<br>Publication date<br>[reference]   | Results                                                                                                                                                                                                                                                                                                                                                                                                                                                                                |
|----------------------------------------------|----------------------------------------------------------------------------------------------------------------------------------------------------------------------------------------------------------------------------------------------------------------------------------------------------------------------------------------------------------------------------------------------------------------------------------------------------------------------------------------|
| <b>Longitudinal study</b>                    |                                                                                                                                                                                                                                                                                                                                                                                                                                                                                        |
| <b>Self-rated poor general mental health</b> |                                                                                                                                                                                                                                                                                                                                                                                                                                                                                        |
| Andersson<br>2008 [2]                        | <b>Mental health problems</b> s-empl vs empl:<br>1991: 20.1% vs 22.2%; 2000: 29.9% vs 33.0%<br>Mental health problems of empl (1991, no problems) who <b>move to s-empl</b> (2000) [FE (aSE)]:<br>0.493(0.340)*                                                                                                                                                                                                                                                                        |
| <b>Cross-sectional studies</b>               |                                                                                                                                                                                                                                                                                                                                                                                                                                                                                        |
| <b>Any mental illness</b>                    |                                                                                                                                                                                                                                                                                                                                                                                                                                                                                        |
| Grégoris<br>2017 [4]                         | <b>Sleep disorders</b><br>s-empl vs empl: 37% vs 23.4% *                                                                                                                                                                                                                                                                                                                                                                                                                               |
| Kawakami<br>1996 [9]                         | <b>Any psychiatric disorders (e.g. panic, phobic)</b><br>empl (white-collar) and empl (blue-collar) vs s-empl (ref.):<br>last six months: OR 2.23 (95%-CI 0.50-9.82) and 0.41 (95%-CI 0.03-4.51)<br>lifetime: OR 1.29 (95%-CI 0.44-3.74) and 0.65 (95%-CI 0.16-2.57)                                                                                                                                                                                                                   |
| <b>Depression</b>                            |                                                                                                                                                                                                                                                                                                                                                                                                                                                                                        |
| Rugulies<br>2010 [6]                         | <b>1. Depressive symptoms</b> s-empl (high-grade) and s-empl (low-grade) vs empl (high-level non-manual, ref.) [Mean(SD); Hopkins Symptom Checklist 92 item version, 13 items for depression (0 = no depression; 52 = extreme depression)]:<br>0.47 (0.44) and 0.58 (0.68) vs 0.45 (0.55); Beta (SE) 0.07 (0.17) and 0.14 (0.11)<br><b>2. Severe depressive symptoms</b> s-empl vs empl (ref. = 5.2 %):<br>7.7% and 14.3%; OR 1.46 (95%-CI 0.16–13.73) and OR 2.97 (95%-CI 0.87–10.06) |
| Atherton<br>2007 [3]                         | <b>Depressive symptoms</b> s-empl vs empl (managerial/professional = ref.):<br>male: 6.0% vs 5.9%; OR 1.03 (95%-CI 0.70, 1.52), female: 8.7% vs 7.4%; OR 1.19 (95%-CI 0.76, 1.88)                                                                                                                                                                                                                                                                                                      |
| Kawakami<br>1996 [9]                         | <b>Life time major depressive episode</b> s-empl (ref.) vs empl (white-collar) vs empl (blue-collar):<br>OR 1.16 (95%-CI 0.34-3.90) vs OR 0.66 (95%-CI 0.14-3.14)                                                                                                                                                                                                                                                                                                                      |
| <b>Suicidal thoughts</b>                     |                                                                                                                                                                                                                                                                                                                                                                                                                                                                                        |
| Min<br>2019 [12]                             | <b>1. Suicidal ideation</b><br>s-empl (small business owner) vs s-empl (middle-large business owner) vs empl (ref.):<br>aOR 1.25 (95%-CI 1.15-1.35)* vs 1.32 (1.09-1.61)<br><b>2. Suicidal attempt</b><br>s-empl (small business owner) vs s-empl (middle-large business owner) vs empl (ref.):<br>aOR 1.67 (95%-CI 1.14-2.45)* vs 1.42 (0.51-3.98)                                                                                                                                    |
| <b>Anxiety / neurotic symptoms</b>           |                                                                                                                                                                                                                                                                                                                                                                                                                                                                                        |
| Rugulies<br>2009 [6]                         | <b>1. Anxiety symptoms</b> s-empl (high-grade) and s-empl (low-grade) vs empl (high-level non-manual, ref.) [Mean(SD); Hopkins Symptom Checklist 92 item version, 10 items for anxiety (0 = no anxiety; 40 = extreme anxiety)]:<br>0.27 (0.21) and 0.48 (0.58) vs 0.41 (0.49); Beta (SE) -0.12 (0.14) and 0.07 (0.09)<br><b>2. Severe anxiety symptoms</b> s-empl (high-grade) and s-empl (low-grade) vs empl (ref. = 9.6%):<br>0% and 14.3%; -- and OR 1.58 (95%-CI 0.53–4.69)        |
| Atherton<br>2007 [3]                         | <b>Anxiety</b> s-empl vs empl (professional/managerial = ref):<br>male: 4.6%; OR 0.84 (95%-CI 0.55, 1.29), 5.4%, female: 7.0%; OR 0.98 (95%-CI 0.59, 1.60) vs 7.1                                                                                                                                                                                                                                                                                                                      |

|                  |                                                                                                                                                                                                                                     |
|------------------|-------------------------------------------------------------------------------------------------------------------------------------------------------------------------------------------------------------------------------------|
| Lin<br>2003 [11] | <b>Non-psychotic neurotic symptoms</b> s-empl (drivers) vs empl (drivers) [Mean(SD); 12-item Chinese Health Questionnaire (cut-off point $\geq 4$ = high risk group)]: 2.08(2.42) * vs 0.94(1.53)<br>CHQ $\geq 4$ : 7.5% vs 21.3% * |
|------------------|-------------------------------------------------------------------------------------------------------------------------------------------------------------------------------------------------------------------------------------|

### Stress / Burnout / Exhaustion

|                            |                                                                                                                                                                                                                                                                                                                                                                                                                            |
|----------------------------|----------------------------------------------------------------------------------------------------------------------------------------------------------------------------------------------------------------------------------------------------------------------------------------------------------------------------------------------------------------------------------------------------------------------------|
| Grégoris<br>2017 [4]       | <b>Feeling stressed</b> s-empl vs empl: 57.5% vs 41.6% *<br><b>Abnormal stress</b> s-empl vs empl: 17.8% vs 15.5%                                                                                                                                                                                                                                                                                                          |
| Jamal<br>2007 [8]          | s-empl vs empl (organizational) among Canadian (C) / Pakistani (P)<br>[Mean (F-value); 22-item Maslach Burnout Inventory (0 = no burnout; 132 = extreme burnout)]:<br><b>1. Overall burnout</b> C: 38.13 vs 31.96 (18.84)* P: 33.23 vs 28.44 (8.99)*<br><b>2. Emotional exhaustion</b> C: 26.13 vs 22.23 (15.59)* P: 23.11 vs 19.67 (12.86)*<br><b>3. Depersonalisation</b> C: 9.97 vs 11.05 (1.89) P: 9.29 vs 8.87 (0.88) |
| Prottas<br>2006 [14]       | <b>Stress</b> s-empl(without personnel) vs s-empl (with personnel) vs empl (ref.) [Mean(SD); 10-item 5 point Likert scale (10 = no stress; 50 = extreme Stress):<br>0.04(0.6), 0.09 vs 0.03(0.6), Cohens d: 0.02 vs -0.01(0.56)                                                                                                                                                                                            |
| Fujino<br>2005 [7]         | <b>Perceived stress</b> s-empl vs empl (data from 1988-90):<br>frequent: male: 11.3% vs 15.9%, female: 11.8% vs 15.1%<br>occasional: male: 11.0% vs 18.2%, female: 10.8% vs 15.1%                                                                                                                                                                                                                                          |
| Parasuraman<br>2001 [13]   | <b>Life stress</b> s-empl vs empl [Mean (SD); 10-item scale developed by the authors]: 2.87 (0.66) vs 2.82 (0.76)                                                                                                                                                                                                                                                                                                          |
| Lewin-Epstein<br>1991 [10] | <b>Work-related stress</b> s-empl vs empl [Mean(SD); 7-point Likert scale (1 = no stress, 7 = extreme stress)]: 3.9 (2.3) vs 3.2 (2.1), effect (b)=0.04 *                                                                                                                                                                                                                                                                  |

### Self-rated poor general mental health

|                       |                                                                                                                                                                                                                                   |
|-----------------------|-----------------------------------------------------------------------------------------------------------------------------------------------------------------------------------------------------------------------------------|
| Hounscome<br>2012 [5] | <b>General health</b> s-empl vs empl [Mean(SE); 12-item General Health Questionnaire (0 = good general health; 36 = bad general health)]:<br>farmers: 10.66 (0.318) vs 10.46 (0.521)<br>non-farmers: 9.17 (0.518) vs 9.66 (0.255) |
|-----------------------|-----------------------------------------------------------------------------------------------------------------------------------------------------------------------------------------------------------------------------------|

\*  $p < 0.050$ , vs = versus, ref. = reference, CI = confidence interval, OR = odds ratio, aOR = adjusted odds ratio, SD = standard deviation, SE = standard error, aSE adjusted standard error, FE = fixed effects

Table S4. **Overview of mental health outcomes** among self-employed compared to employed persons in longitudinal and cross-sectional observational studies with moderate or poor quality.

| Study Design    | Author, Publication date [reference] | Any mental illness |          | Depression or suicidal thoughts |          | Anxiety or Neuroses | Stress or Exhaustion or Burnout | Self-rated poor general mental health |
|-----------------|--------------------------------------|--------------------|----------|---------------------------------|----------|---------------------|---------------------------------|---------------------------------------|
| Longitudinal    | EUROPE                               |                    |          |                                 |          |                     |                                 |                                       |
|                 | Andersson 2008 [2]                   |                    |          |                                 |          |                     |                                 |                                       |
| Cross-sectional | EUROPE                               |                    |          |                                 |          |                     |                                 |                                       |
|                 | Grégoris 2017 [4]                    |                    |          |                                 |          |                     |                                 |                                       |
|                 | Hounsme 2012 [5]                     |                    |          |                                 |          |                     |                                 |                                       |
|                 | Rugulies 2009 [6]                    |                    |          |                                 |          |                     |                                 |                                       |
|                 | Andersson 2007 [2]                   |                    |          |                                 |          |                     | Exhaustion                      |                                       |
|                 | Atherton 2007 [3]                    |                    |          |                                 |          |                     |                                 |                                       |
|                 | ASIA                                 |                    |          |                                 |          |                     |                                 |                                       |
|                 | Min 2019 [12]                        |                    |          | Suicidal thoughts               |          |                     |                                 |                                       |
|                 | Jamal 2007 [8]                       |                    |          |                                 |          |                     | Burnout                         |                                       |
|                 | Fujino 2005 [7]                      |                    |          |                                 |          |                     |                                 |                                       |
|                 | Lin 2003 [11]                        |                    |          |                                 |          | Neuroses            |                                 |                                       |
|                 | Kawakami 1996 [9]                    | sole               | non-sole | sole                            | non-sole |                     |                                 |                                       |
|                 | Lewin-Epstein 1991 [10]              |                    |          |                                 |          |                     |                                 |                                       |
|                 | NORTH AMERICA                        |                    |          |                                 |          |                     |                                 |                                       |
|                 | Parasuraman 2001 [13]                |                    |          |                                 |          |                     |                                 |                                       |
|                 | Prottas 2006 [14]                    |                    |          |                                 |          |                     |                                 |                                       |

**The self-employed showed**

- = significantly lower occurrence
- = lower occurrence
- = no difference
- = higher occurrence
- = significantly higher occurrence compared to the employed.

**Self-employment subgroups:**

- “sole” = sole proprietorship (vs the employed)
- “non-sole” = employing others (vs the employed)

## References

1. Hoy, D.; Brooks, P.; Woolf, A.; Blyth, F.; March, L.; Bain, C.; Baker, P.; Smith, E.; Buchbinder, R. Assessing risk of bias in prevalence studies: modification of an existing tool and evidence of interrater agreement. *Journal of clinical epidemiology* **2012**, *65*, 934–939.
2. Andersson, P. Happiness and health: Well-being among the self-employed. *The Journal of Socio-Economics* **2008**, *37*, 213–236.
3. Atherton, K.; Power, C. Health inequalities with the National Statistics-Socioeconomic classification: disease risk factors and health in the 1958 British birth cohort. *European journal of public health* **2007**, *17*, 486–491.
4. Grégoris, M.; Deschamps, F.; Salles, J.; Sanchez, S. Health assessment of self-employed in the food service industry. *International journal of occupational and environmental health* **2017**, *23*, 234–242.
5. Hounsome, B.; Edwards, R.T.; Hounsome, N.; Edwards-Jones, G. Psychological morbidity of farmers and non-farming population: results from a UK survey. *Community mental health journal* **2012**, *48*, 503–510.
6. Rugulies, R.; Madsen, I.E.H.; Nielsen, M.B.D.; Olsen, L.R.; Mortensen, E.L.; Bech, P. Occupational position and its relation to mental distress in a random sample of Danish residents. *International archives of occupational and environmental health* **2010**, *83*, 625–629.
7. Fujino, Y.; Iso, H.; Tamakoshi, A.; Inaba, Y.; Koizumi, A.; Kubo, T.; Yoshimura, T. A Prospective Cohort Study of Employment Status and Mortality from Circulatory Disorders among Japanese Workers. *Journal of occupational health* **2005**, *47*, 510–517.
8. Jamal, M. Burnout and self-employment: a cross-cultural empirical study. *Stress and Health* **2007**, *23*, 249–256.
9. Kawakami, N.; Iwata, N.; Tanigawa, T.; Oga, H.; Araki, S.; Fujihara, S.; Kitamura, T. Prevalence of mood and Anxiety Disorders in a Working Population in Japan. *JOEM* **1996**, *38*, 899–905.
10. Lewin-Epstein, N.; Yuchtman-Yaar, E. Health Risks of Self-Employed. *Work and Occupations* **1991**, *8*, 291–312.
11. Lin, S.-K.; Lee, C.-H.; pan, C.-H.; Hu, W.-H. Comparison of the prevalence of substance use and psychiatric disorders between government- and self-employed commercial drivers. *Psychiatry and clinical neurosciences* **2003**, 425–431.
12. Min, J.-Y.; Kim, H.; Park, S.-G.; Hwang, S.H.; Min, K.-B. Differences in suicidal behaviors between self-employed and standardly employed workers. *American journal of industrial medicine* **2019**, *62*, 1144–1151.
13. Parasuraman, S.; Simmers, C.A. Type of employment, work-family conflict and well-being: a comparative study. *J. Organiz. Behav.* **2001**, *22*, 551–568.
14. Prottas, D.J.; Thompson, C.A. Stress, satisfaction, and the work-family interface: a comparison of self-employed business owners, independents, and organizational employees. *Journal of occupational health psychology* **2006**, *11*, 366–378.
